# Supplementary material for: Fabrication of a graphene oxide/zeolitic imidazolate framework-8 (GO/ZIF-8) composite for enhanced adsorptive and piezo-assisted photocatalytic removal of organic dyes
Source: Royal Society of Chemistry journal article supplement (doi:10.1039/d5nj01124h), 2025-01-01
Supplement: d5nj01124h1.pdf [file d5nj01124h1.pdf]

## Supporting information

### Fabrication of graphene oxide/zeolitic imidazolate frameworks-8 (GO/ZIF-8) composite with enhanced adsorptive and piezo-assisted photocatalytic removal of organic dyes

*Milad Atighi<sup>a,1</sup>, Ghazaleh Falahati<sup>a,1</sup>, Mahdi Hasanazadeh<sup>a\*</sup>, Najmeh Gholami<sup>a</sup>, Hanieh Ahmadi<sup>a</sup>, Mina Najafi<sup>b</sup>*

<sup>a</sup> Department of Textile Engineering, Yazd University, P.O. Box, 89195-741 Yazd, Iran.

<sup>b</sup> Department of Chemistry, Iran University of Science and Technology, P.O. Box, Narmak 16846-13114, Tehran, Iran

<sup>1</sup>These authors contributed equally to this work.

*\*Corresponding author:*

*Mahdi Hasanazadeh, E-mail: [m.hasanzadeh@yazd.ac.ir](mailto:m.hasanzadeh@yazd.ac.ir); Tel: +98-353-1232569; Fax: +98-353-8209817;*

*ORCID iD: 0000-0003-4951-8348*

## **Table of content:**

**Figure S1.** Chemical structure of organic dye (C.I. Acid Red 88).

**Figure S2.** The density of acidic and basic active sites on the surface of GO and GO/ZIF-8 nanocomposite.

**Figure S3.** The plots of isotherm models for adsorption of AR88 dye on the GO/ZIF-8 nanocomposite in (a) dark and (b) light conditions.

**Figure S4.** The plots of pseudo-first-order and pseudo-second-order kinetic models for adsorption of AR88 dye on the GO/ZIF-8 nanocomposite in (a) dark and (b) light conditions.

**Figure S5.** The plots of the intraparticle diffusion model for adsorption of AR88 dye on the GO/ZIF-8 nanocomposite in (a) dark and (b) light conditions.

**Figure S6.** Thermodynamic plot for the adsorption of AR88 dye on the GO/ZIF-8 nanocomposite.

**Figure S7.** Piezo-photocatalytic degradation rates of different dyes with GO/ZIF-8 nanocomposite.

**Figure S8.** The plots of kinetic of catalytic degradation of AR88 dye at different catalytic conditions of piezocatalytic, photocatalytic, and piezo-photocatalytic. (a-c) zero-order, (d-f) first-order, and (g-i) second order models.

**Figure S9.** Mass spectrum of AR88 dye after piezo-photocatalytic degradation.

**Figure S10.** Reusability test of the GO/ZIF-8 nanocomposite in piezo-photocatalytic degradation of AR88 dye.

**Figure S11.** XRD patterns of the GO/ZIF-8 nanocomposite before and after piezo-photocatalytic degradation of AR88 dye.

**Table S1.** The porous characteristics of the GO/ZIF-8 nanocomposite

**Table S2.** Detected intermediates of AR88 during piezo-photocatalytic degradation

**Table S3.** Comparison of the adsorption capacity of the GO/ZIF-8 nanocomposite with related adsorbents reported in the literature

**Table S4.** Comparison of the degradation performance of the GO/ZIF-8 nanocomposite with related catalysts reported in the literature

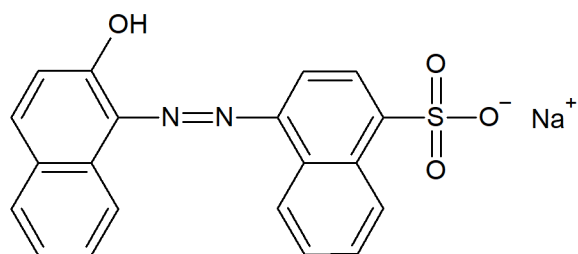

**Figure S1.** Chemical structure of organic dye (C.I. Acid Red 88).

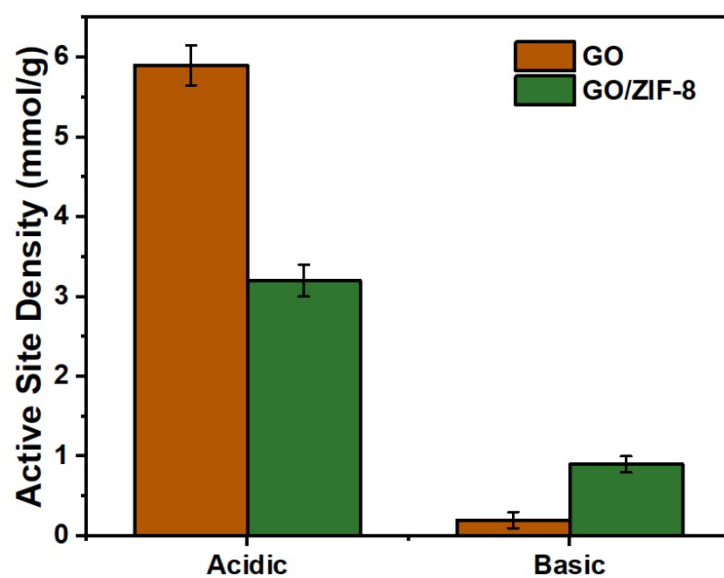

**Figure S2.** The density of acidic and basic active sites on the surface of GO and GO/ZIF-8 nanocomposite.

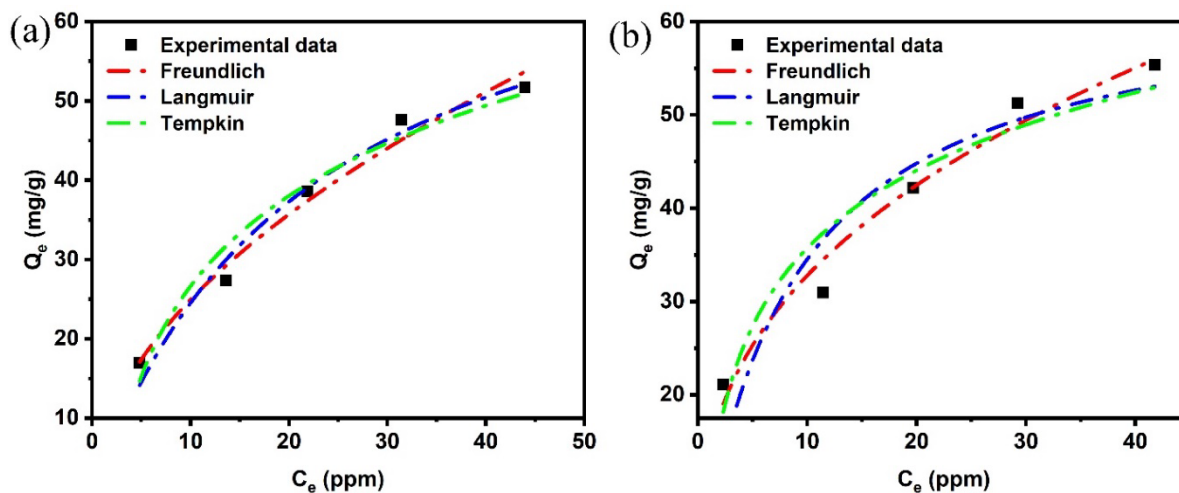

**Figure S3.** The plots of isotherm models for adsorption of AR88 dye on the GO/ZIF-8 nanocomposite in (a) dark and (b) light conditions.

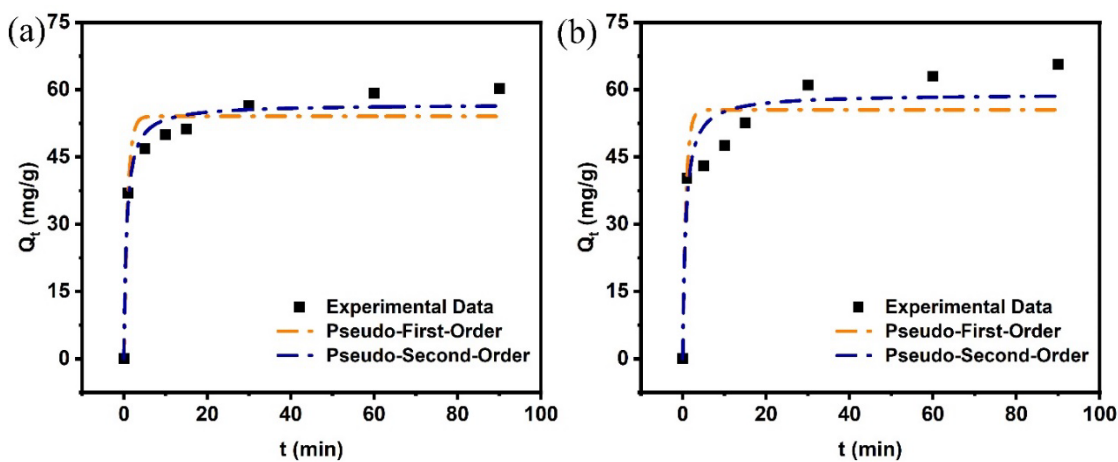

**Figure S4.** The plots of pseudo-first-order and pseudo-second-order kinetic models for adsorption of AR88 dye on the GO/ZIF-8 nanocomposite in (a) dark and (b) light conditions.

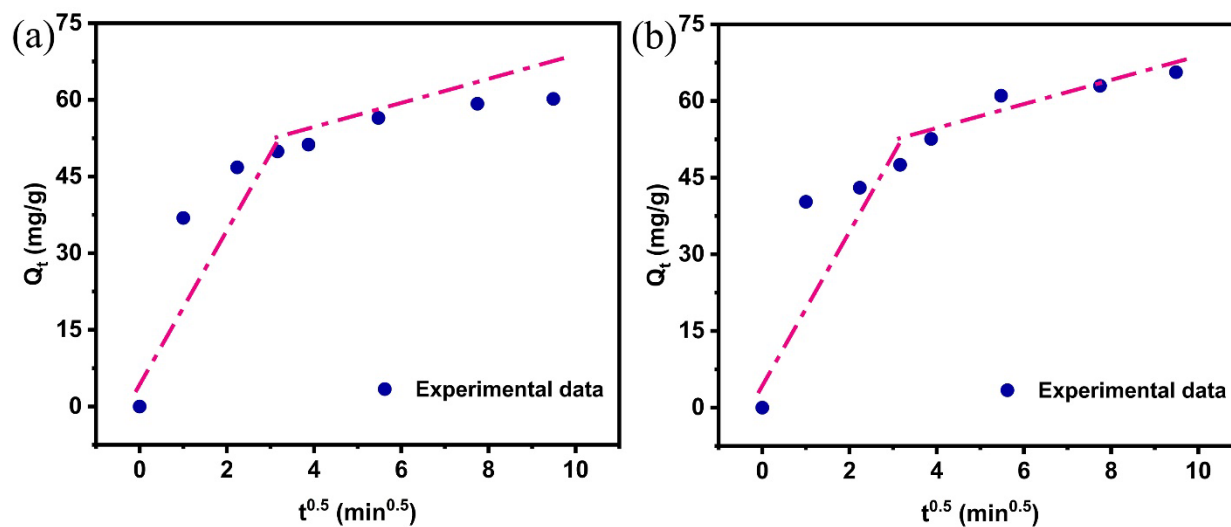

**Figure S5.** The plots of the intraparticle diffusion model for adsorption of AR88 dye on the GO/ZIF-8 nanocomposite in (a) dark and (b) light conditions.

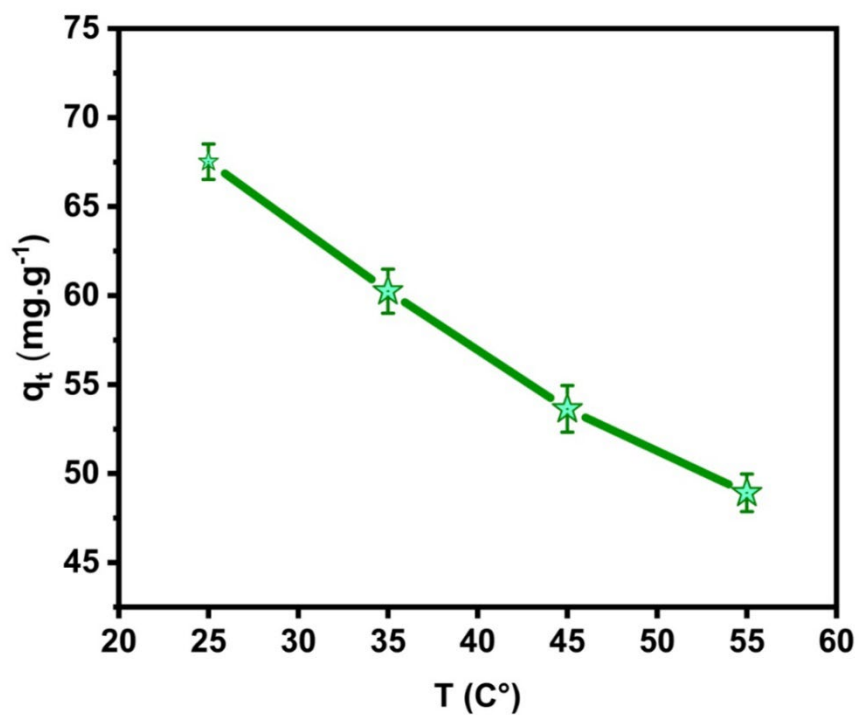

**Figure S6.** Thermodynamic plot for the adsorption of AR88 dye on the GO/ZIF-8 nanocomposite.

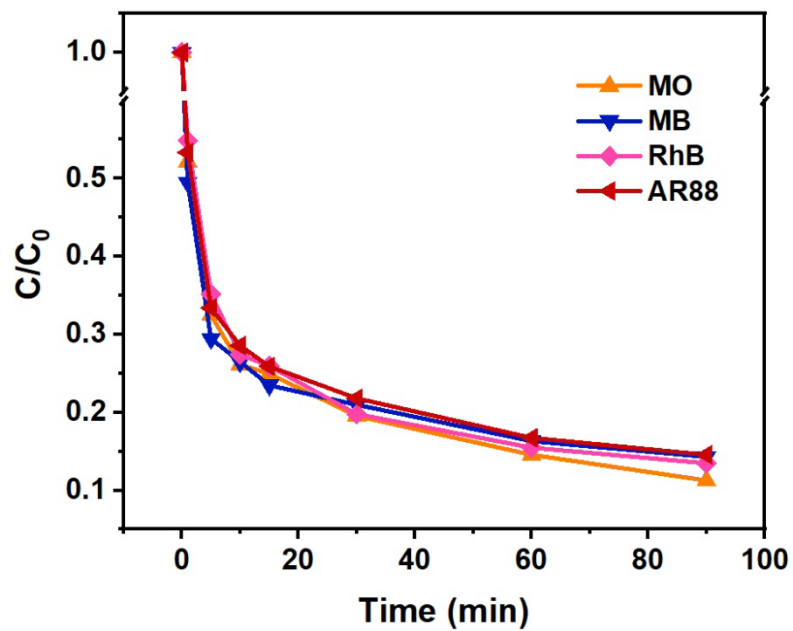

**Figure S7.** Piezo-photocatalytic degradation rates of different dyes with GO/ZIF-8 nanocomposite.

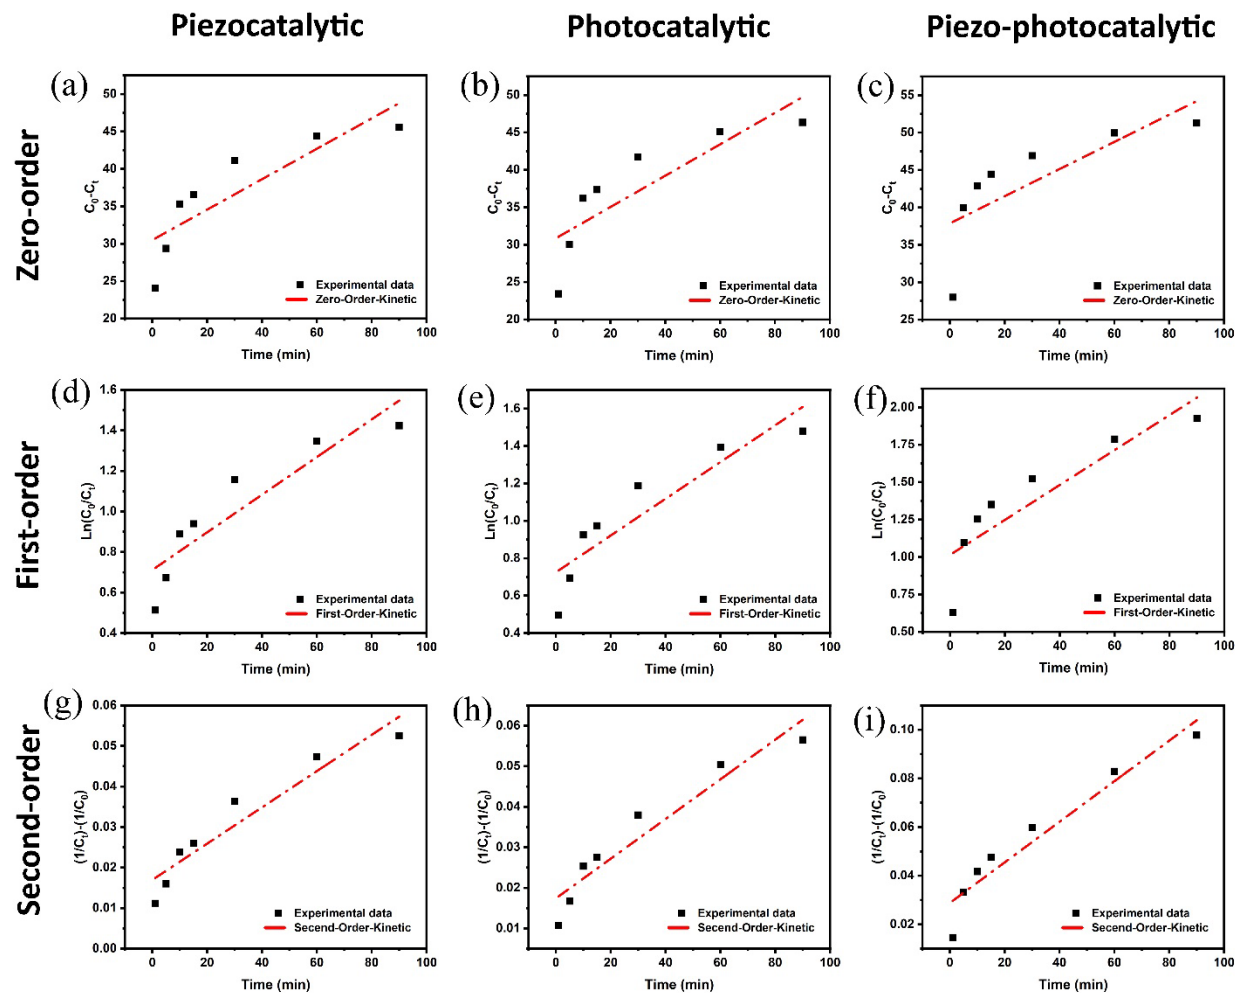

**Figure S8.** The plots of kinetic of catalytic degradation of AR88 dye at different catalytic conditions of piezocatalytic, photocatalytic, and piezo-photocatalytic. (a-c) zero-order, (d-f) first-order, and (g-i) second order models.



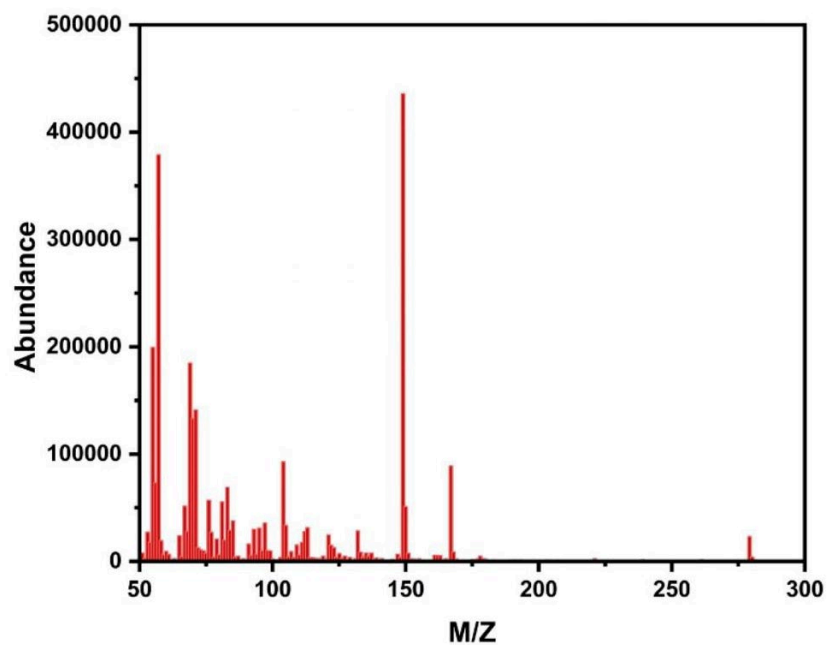

**Figure S9.** Mass spectrum of AR88 dye after piezo-photocatalytic degradation.

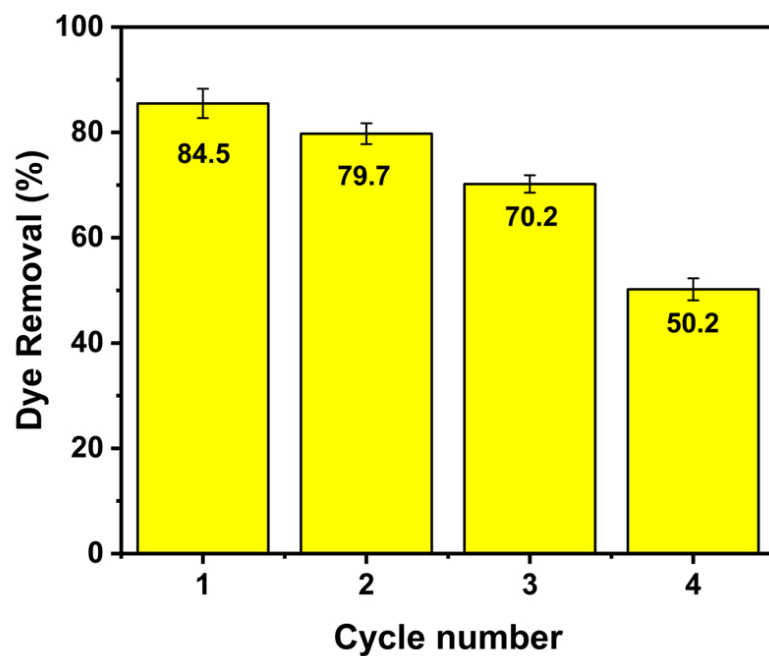

**Figure S10.** Reusability test of the GO/ZIF-8 nanocomposite in piezo-photocatalytic degradation of AR88 dye.

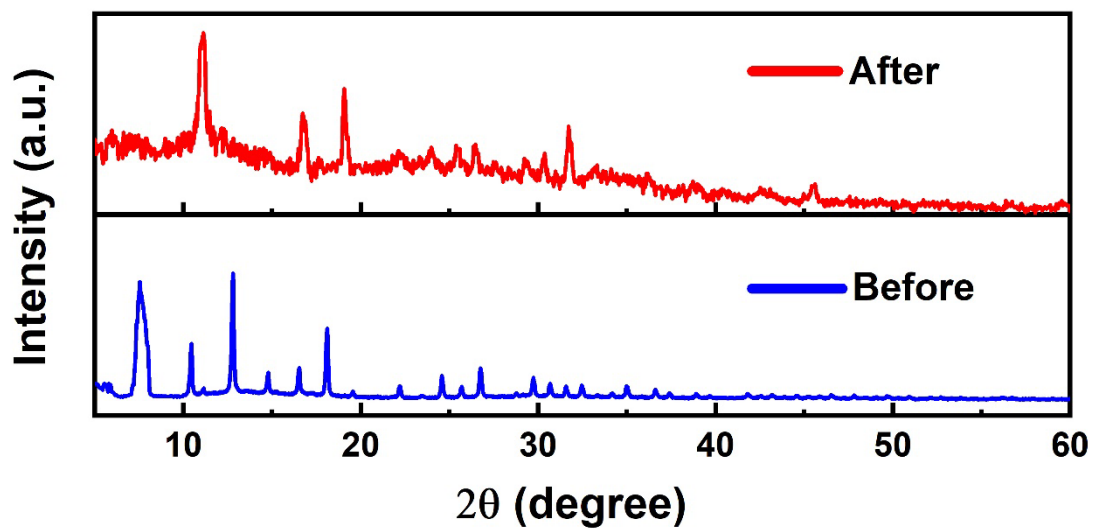

**Figure S11.** XRD patterns of the GO/ZIF-8 nanocomposite before and after piezo-photocatalytic degradation of AR88 dye.

**Table S1.** The porous characteristics of the GO/ZIF-8 nanocomposite

| Sample   | Specific surface area (m <sup>2</sup> /g) | Pore volume (cm <sup>3</sup> /g) | Pore width distribution (nm) |
|----------|-------------------------------------------|----------------------------------|------------------------------|
| GO       | 85.27                                     | 0.031                            | 2.45                         |
| ZIF-8    | 850.86                                    | 0.45                             | 2.142                        |
| GO/ZIF-8 | 804.13                                    | 0.76                             | 3.782                        |

**Table S2.** Detected intermediates of AR88 during piezo-photocatalytic degradation

| m/z | Proposed Compound                     | Suggested Structure Fragmentation | Chemical Structure                                                                   |
|-----|---------------------------------------|-----------------------------------|--------------------------------------------------------------------------------------|
| 350 | Acid Red 88 (AR88)                    | Parent dye molecule               | 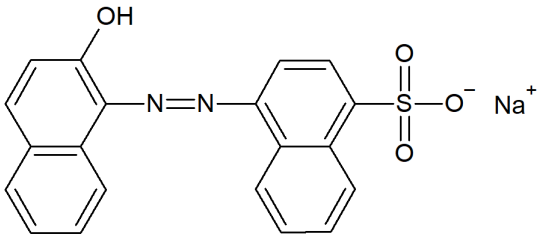   |
| 158 | 1,2-Naphthoquinone                    | Oxidized form of naphthalene-2-ol |    |
| 144 | Naphthalene-2-ol / 1-amino-2-naphthol | Azo bond cleavage products        |  |
| 166 | Phthalic acid                         | Oxidized ring-opening product     |  |
| 128 | Naphthalene                           | Deaminated aromatic structure     |  |

|     |              |                               |                                                                                    |
|-----|--------------|-------------------------------|------------------------------------------------------------------------------------|
| 122 | Benzoic acid | Terminal degradation product  | 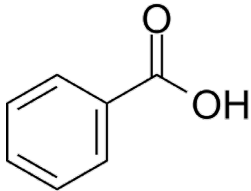 |
| 116 | Maleic acid  | Small chain dicarboxylic acid |  |

**Table S3.** Comparison of the adsorption capacity of the GO/ZIF-8 nanocomposite with related adsorbents reported in the literature

| Adsorbent                            | Dye | Adsorption kinetic (isotherm) | Adsorption condition                                | Adsorption capacity (mg/g) | Ref. |
|--------------------------------------|-----|-------------------------------|-----------------------------------------------------|----------------------------|------|
| Ag/ZnO/3DG                           | MB  | PSO                           | m=0.3 mg, C <sub>0</sub> =10 ppm                    | 310                        | [1]  |
| Fe <sub>3</sub> O <sub>4</sub> /GA   | BPA | PSO (Langmuir)                | m=20 mg, C <sub>0</sub> =25-400 ppm                 | 253.8                      | [2]  |
| GO/1-octadecylamine                  | MG  | PSO (Freundlich)              | m=5 mg, C <sub>0</sub> =50-2500 ppm                 | 2687.56                    | [3]  |
| PPGA                                 | MO  | PSO (Langmuir)                | m=2.5 mg, C <sub>0</sub> =1-70 ppm                  | 202.8                      | [4]  |
| GO/silk fibroin aerogels             | MB  | PSO (Langmuir)                | m=1 mg, C <sub>0</sub> =100 µmol/L                  | 1322.71                    | [5]  |
| rGO/TNT-3%                           | MB  | PFO (Langmuir)                | m=0.1 g, C <sub>0</sub> =10-60 ppm                  | 26.3                       | [6]  |
|                                      | MO  |                               |                                                     | 1.6                        |      |
| Bi <sub>2</sub> O <sub>3</sub> @GO   | RhB | PFO (Temkin /Langmuir)        | m=5 mg, C <sub>0</sub> =1-90 ppm                    | 320                        | [7]  |
| PFGA                                 | MO  | (Freundlich)                  | m=0.2 g, C <sub>0</sub> =50-300 ppm                 | 3059.2                     | [8]  |
|                                      | AM  | (Langmuir)                    | m=0.2 g, C <sub>0</sub> =50-300 ppm                 | 2043.7                     |      |
| 3DG                                  | MO  | (Langmuir)                    | m=0.15 g, C <sub>0</sub> =50-300 ppm, time = 60 min | 27.93                      | [9]  |
| GA                                   | MB  | PSO (Langmuir)                | m=6 mg, C <sub>0</sub> =20 ppm, time = 30 min       | 76                         | [10] |
|                                      | MG  |                               |                                                     | 352                        |      |
|                                      | RhB |                               |                                                     | 111                        |      |
|                                      | MO  |                               |                                                     | 16                         |      |
| CoFe <sub>2</sub> O <sub>4</sub> /GO | MB  | PSO (Langmuir)                | m=30 mg, C <sub>0</sub> =20 ppm, time = 7 h         | 355.9                      | [11] |
|                                      | RhB |                               |                                                     | 284.9                      |      |
|                                      | MO  |                               |                                                     | 53                         |      |

|          |      |                  |                                    |       |            |
|----------|------|------------------|------------------------------------|-------|------------|
| GO/ZIF-8 | AR88 | PSO (Freundlich) | m = 15 mg, C <sub>0</sub> = 60 ppm | 65.63 | This study |
|----------|------|------------------|------------------------------------|-------|------------|

3DG: three-dimensional graphene; GO: graphene oxide; PPGA: polydopamine and polyethylenimine co-functionalized graphene oxide aerogel; PFGA: polyethyleneimine-functionalized graphene aerogel; TNT: titanate nanotube; BPA: bisphenol A; AM; Amaranth; PFO: pseudo-first-order; PSO: pseudo-second-order.

**Table S4.** Comparison of the degradation performance of the GO/ZIF-8 nanocomposite with related catalysts reported in the literature

| Photocatalyst | Dye  | Catalytic condition                                                       | Degradation efficiency (%)                             | Ref.       |
|---------------|------|---------------------------------------------------------------------------|--------------------------------------------------------|------------|
| Ag/ZnO/3DG    | MB   | m=0.3 mg, C <sub>0</sub> =10 ppm                                          | UV = 40<br>Visible = 43                                | [1]        |
| rGO/TNT-3%    | MB   | m=0.1 mg, C <sub>0</sub> =20 ppm,<br>time = 60 min (UV) 180 min (visible) | UV = 100<br>Visible = 95                               | [6]        |
|               | MO   | m=0.1 mg, C <sub>0</sub> =20 ppm, time= 180 min                           | Visible = 99.1                                         |            |
| GO/ZIF-8      | AR88 | m = 15 mg, C <sub>0</sub> = 60 ppm, time= 90 min                          | UV = 77.2<br>Ultrasonic= 75.9<br>UV + Ultrasonic= 85.4 | This study |

3DG: three-dimensional graphene; TNT: titanate nanotube.

## References:

1. Kheirabadi M, Samadi M, Asadian E, Zhou Y, Dong C, Zhang J, Moshfegh AZ (2019) Well-designed Ag/ZnO/3D graphene structure for dye removal: Adsorption,

- photocatalysis and physical separation capabilities. *J Colloid Interface Sci* 537:66–78
2. Quan LD, Dang NH, Tu TH, Phuong Linh VN, Mong Thy LT, Nam HM, Phong MT, Hieu NH (2019) Preparation of magnetic iron oxide/graphene aerogel nanocomposites for removal of bisphenol A from water. *Synth Met* 255:116106
  3. Lv M, Yan L, Liu C, et al (2018) Non-covalent functionalized graphene oxide (GO) adsorbent with an organic gelator for co-adsorption of dye, endocrine-disruptor, pharmaceutical and metal ion. *Chem Eng J* 349:791–799
  4. Xu J, Du P, Bi W, Yao G, Li S, Liu H (2020) Graphene oxide aerogels co-functionalized with polydopamine and polyethylenimine for the adsorption of anionic dyes and organic solvents. *Chem Eng Res Des* 154:192–202
  5. Wang S, Ning H, Hu N, Huang K, Weng S, Wu X, Wu L, Liu J, Alamusi (2019) Preparation and characterization of graphene oxide/silk fibroin hybrid aerogel for dye and heavy metal adsorption. *Compos Part B Eng* 163:716–722
  6. Nguyen CH, Juang RS (2019) Efficient removal of methylene blue dye by a hybrid adsorption–photocatalysis process using reduced graphene oxide/titanate nanotube composites for water reuse. *J Ind Eng Chem* 76:296–309
  7. Das TR, Patra S, Madhuri R, Sharma PK (2018) Bismuth oxide decorated graphene oxide nanocomposites synthesized via sonochemical assisted hydrothermal method for adsorption of cationic organic dyes. *J Colloid Interface Sci* 509:82–93
  8. Shu D, Feng F, Han H, Ma Z (2017) Prominent adsorption performance of amino-functionalized ultra-light graphene aerogel for methyl orange and amaranth. *Chem Eng J*

324:1–9

9. Labiadh L, Kamali AR (2019) 3D graphene nanoedges as efficient dye adsorbents with ultra-high thermal regeneration performance. *Appl Surf Sci* 490:383–394
10. Tang S, Xia D, Yao Y, Chen T, Sun J, Yin Y, Shen W, Peng Y (2019) Dye adsorption by self-recoverable, adjustable amphiphilic graphene aerogel. *J Colloid Interface Sci* 554:682–691
11. Chang S, Zhang Q, Lu Y, Wu S, Wang W (2020) High-efficiency and selective adsorption of organic pollutants by magnetic CoFe<sub>2</sub>O<sub>4</sub>/graphene oxide adsorbents: Experimental and molecular dynamics simulation study. *Sep Purif Technol* 238:116400
